# Supplementary material for: Transcriptomics at maize embryo/endosperm interfaces identify a novel transcriptionally distinct endosperm sub-domain adjacent to the embryo scutellum (EAS)
Source: bioRxiv or medRxiv preprint supplement (doi:10.1101/799338), 2019-10-09
Supplement: Supplementary file [file media-1.pdf]

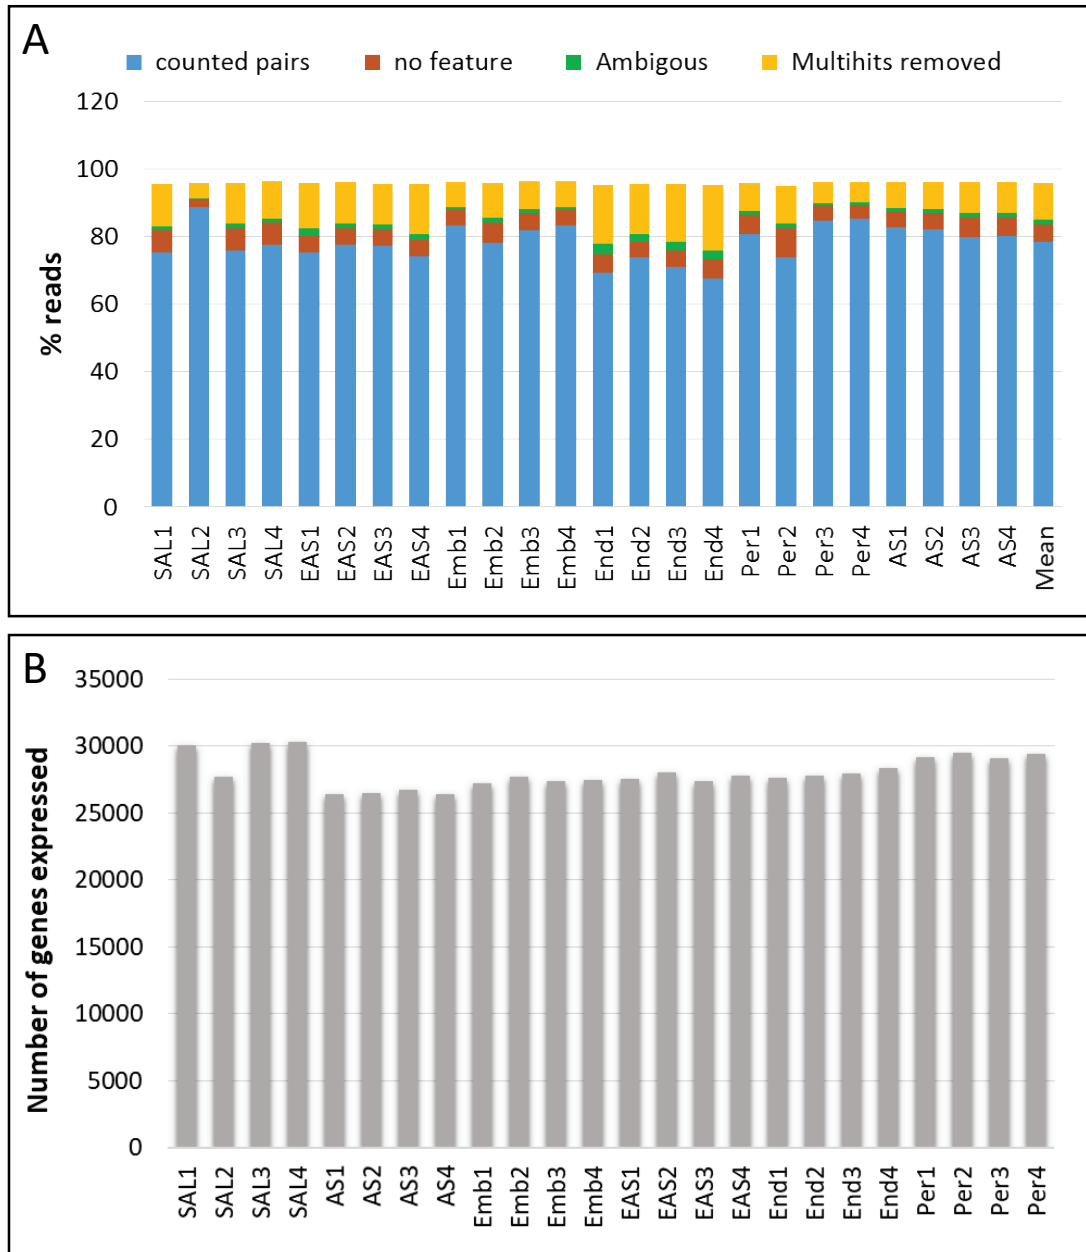

**Supplemental Figure 1. (A)** Proportion of reads mapped and filtered per sample. **(B)** Number of genes expressed with a normalized read counts over 1 for every sample.

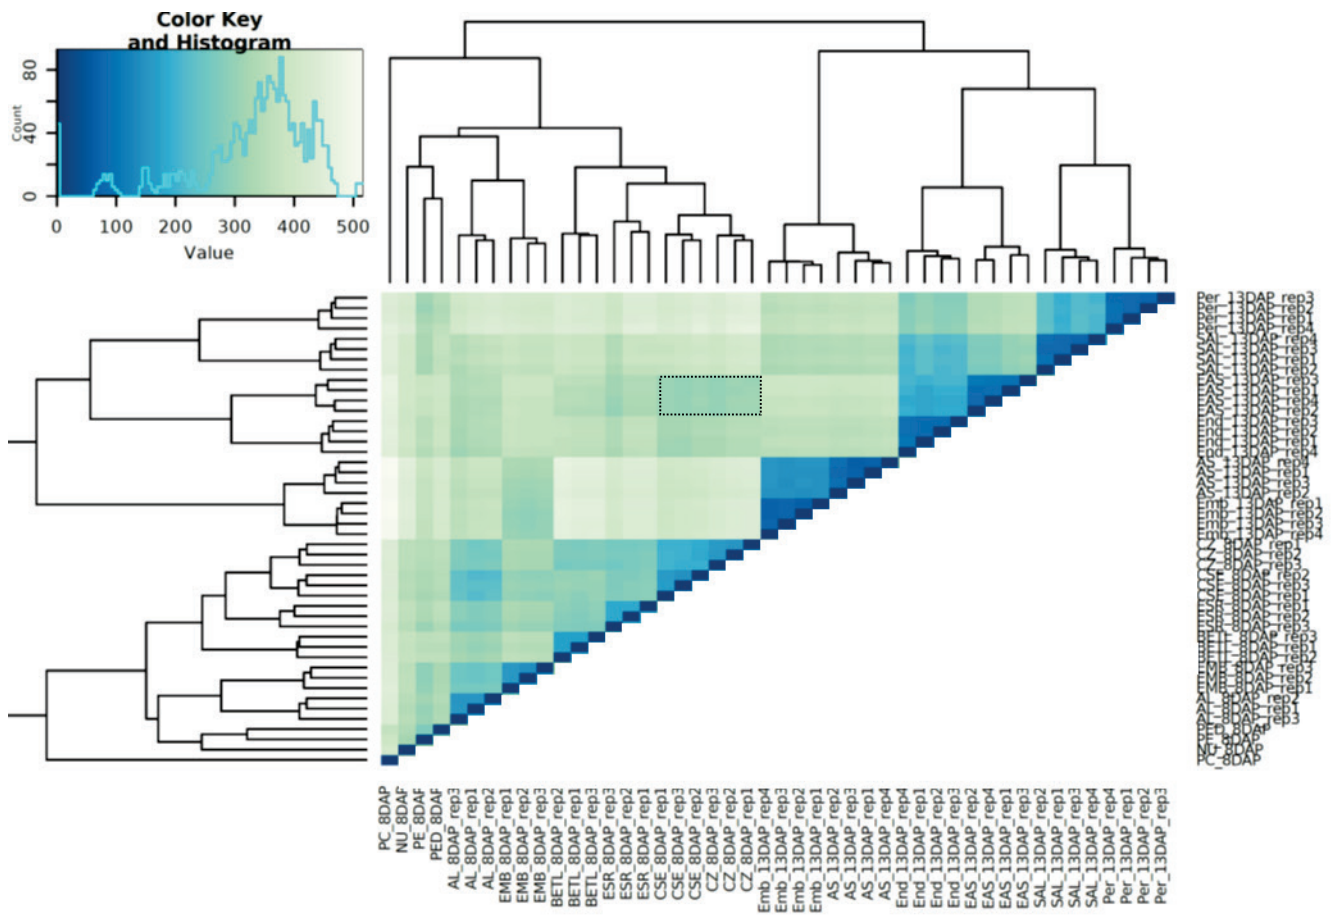

**Supplemental Figure 2.** Comparison between the transcriptomic data generated at 13 DAP in this study, and those at 8 DAP published in Zhan et al, 2015. Rectangle with dotted line shows that EAS samples transcriptome is closer to.

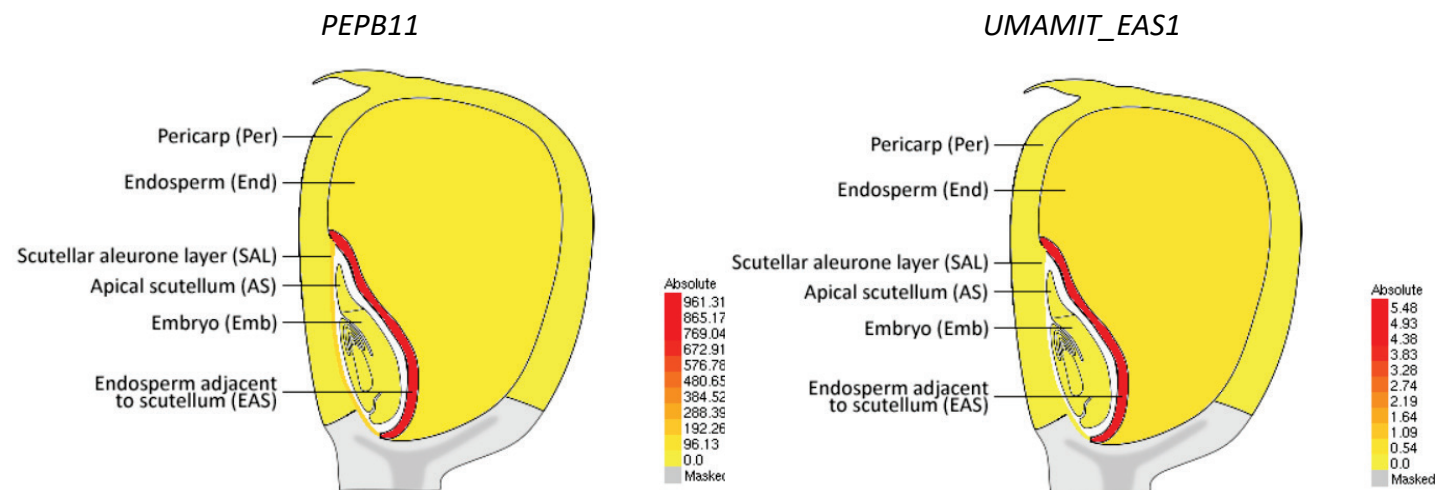

**Supplemental Figure 3.** Example of eFP Browser views ([http://bar.utoronto.ca/efp\\_maize/cgi-bin/efpWeb.cgi?dataSource=Maize\\_Kernel](http://bar.utoronto.ca/efp_maize/cgi-bin/efpWeb.cgi?dataSource=Maize_Kernel)) for two selected EAS marker genes used for *in-situ* hybridization experiment (Figure 3), and having the highest (*PEPB11*) and lowest (*UMAMIT\_EAS1*) expression level in EAS (Supplemental Table 3). Note that the color scale reflecting genes expression level is automatically adjusted and could be manually configured using "Signal Threshold" option.



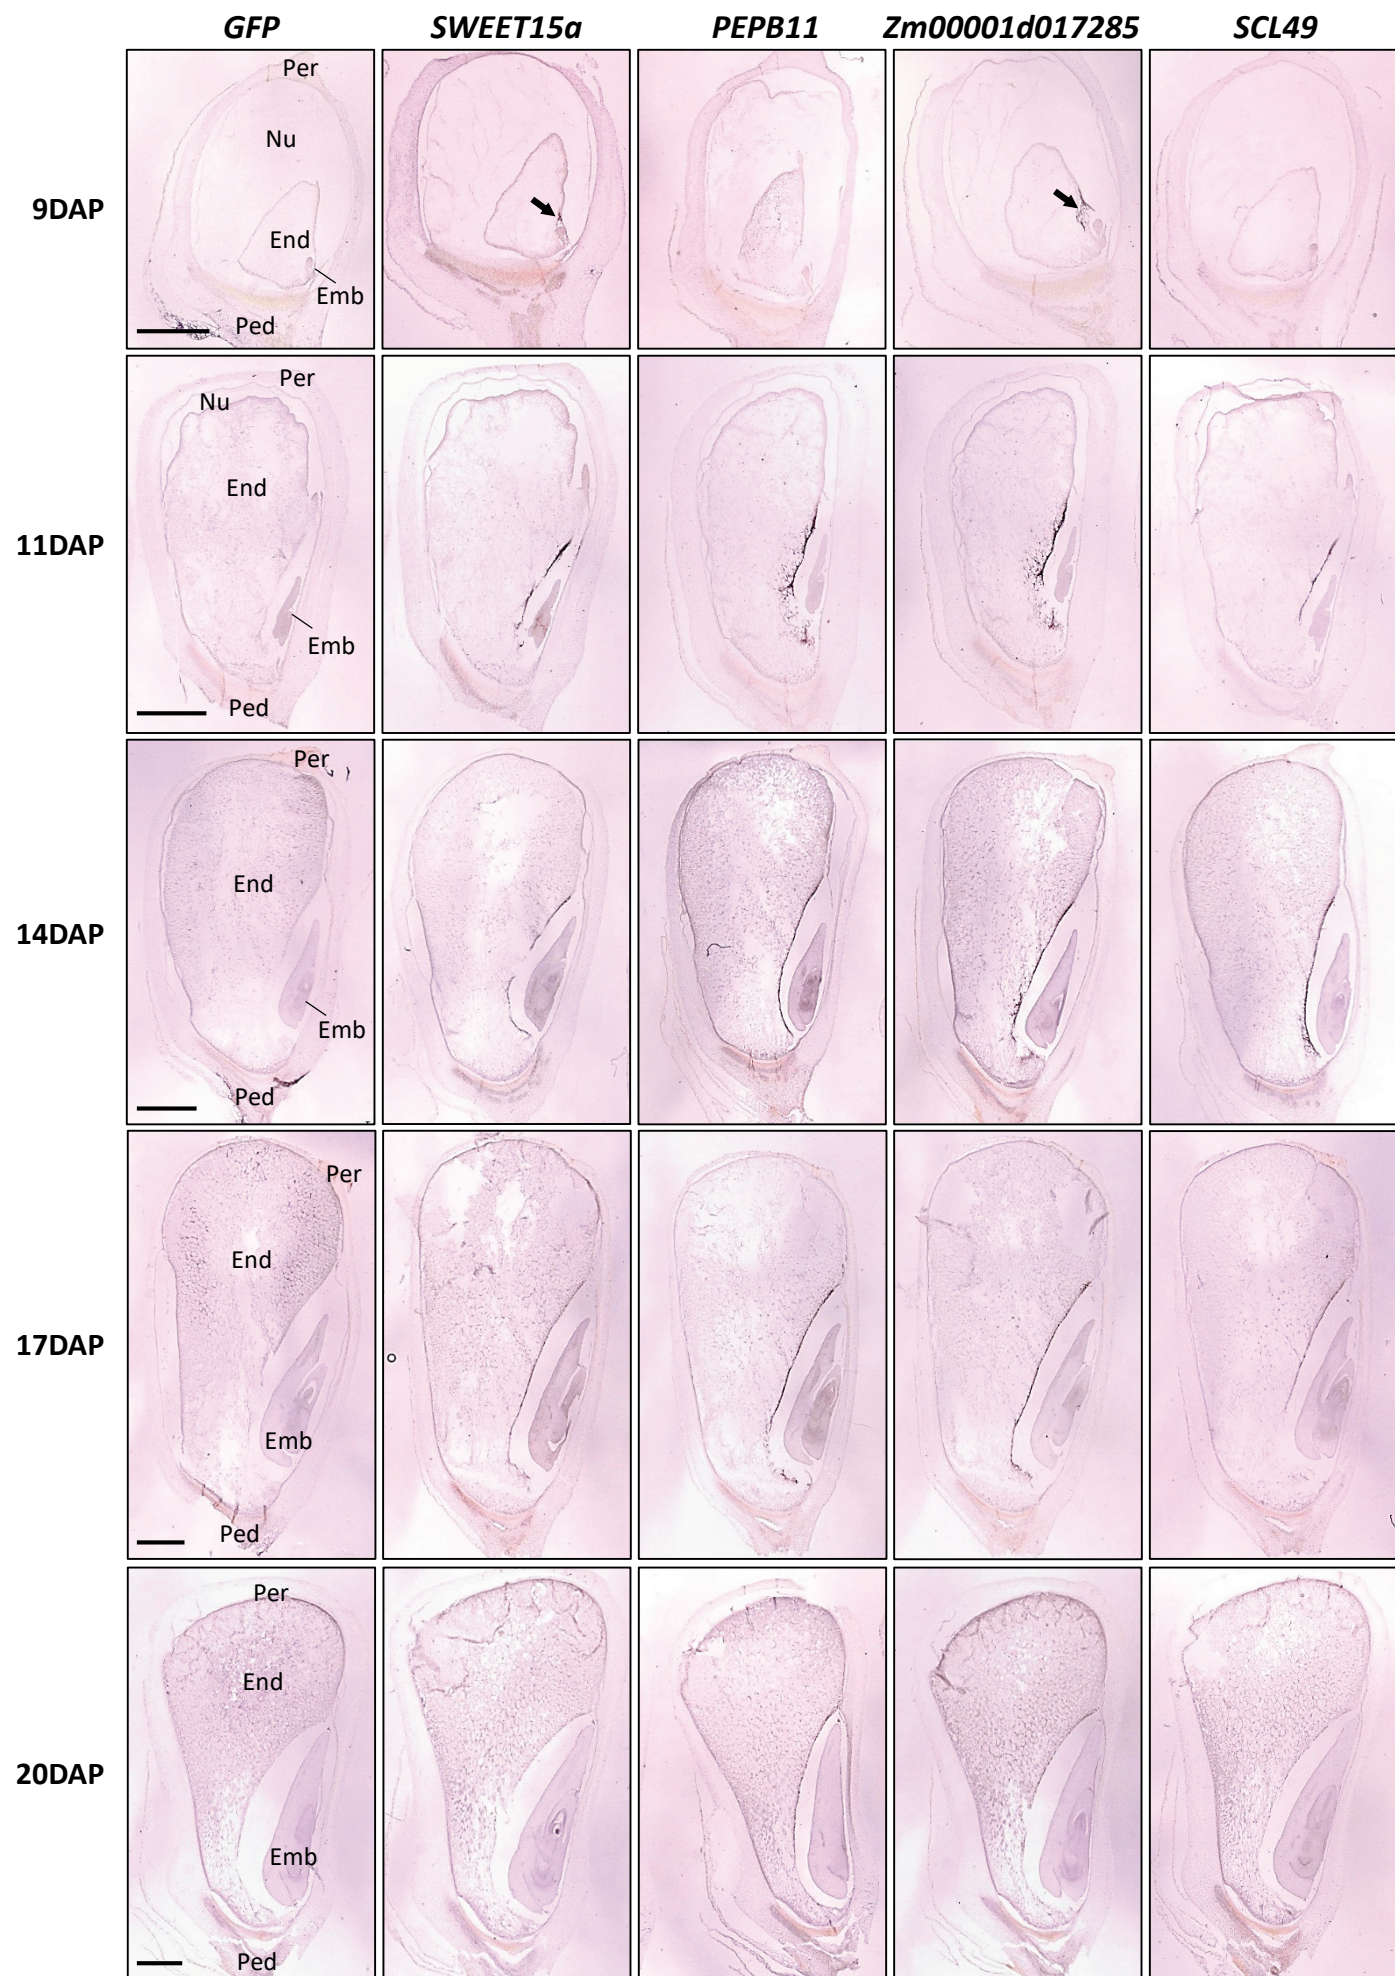

**Supplemental Figure 4.** Legend is here after.

**Supplemental Figure 4.** Pictures representing the the whole kernel for the *in situ* hybridizations presented in figure 4. Four probes detecting EAS marker genes (*SWEET15a*, *PEPB11*, *Zm00001d017285*, *SCL49*) were used on kernel sections at different stage. Scale bars corresponds to 1000  $\mu$ m. For each photo the name of the probe is indicated at the top of the figure and the stage on the left. End = endosperm, emb = embryo, per = pericarp, nu = nucellus, ped = pedicel. Arrows indicate the main *in situ* hybridizations signal at 9DAP.

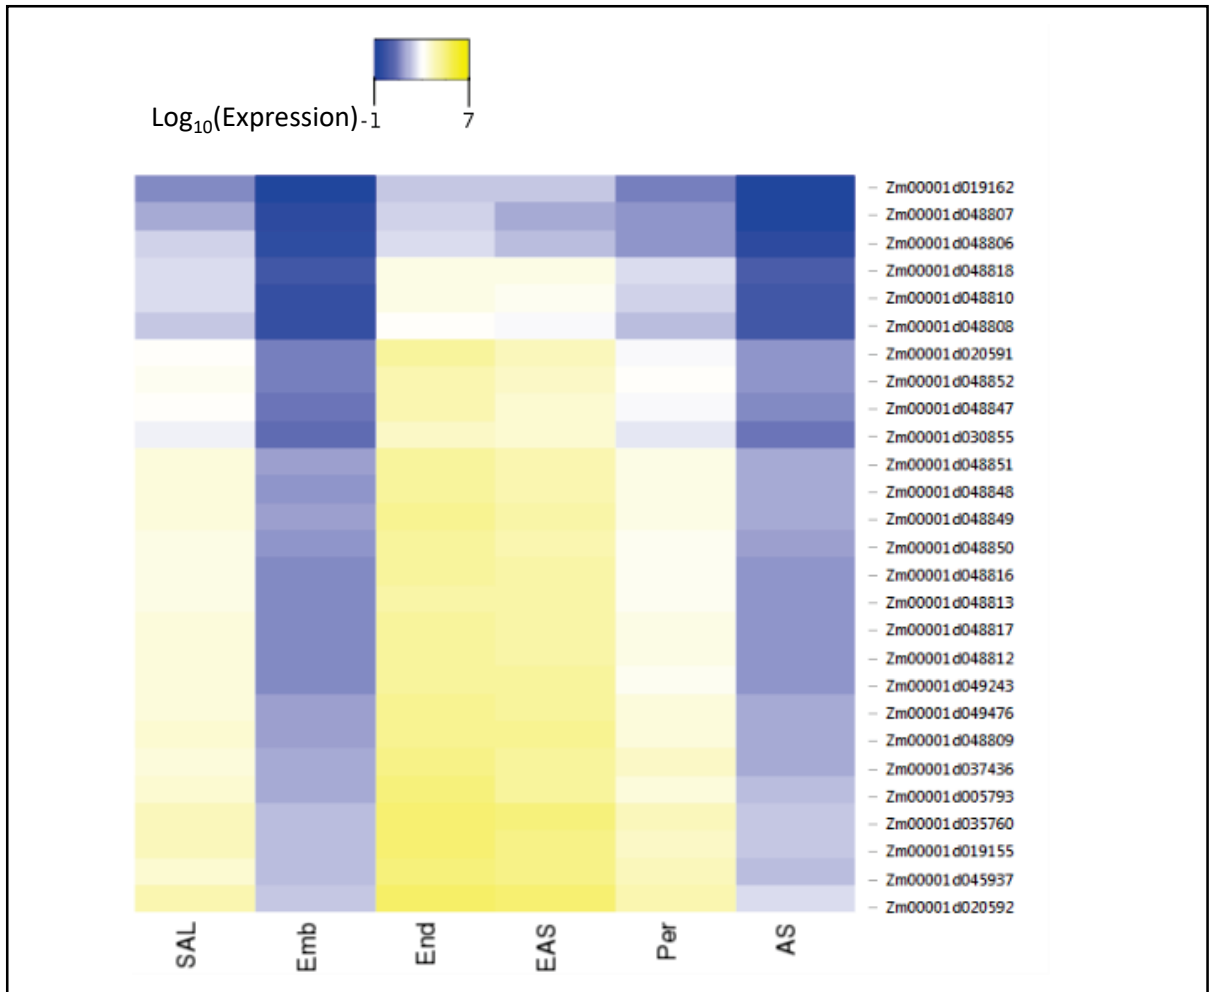

**Supplemental Figure 5.** Heat map of *Zein* precursor gene expression. For the (sub)compartments, the logarithm (base 10) of the average of the normalized read counts between the 4 replicates has been taken. An arbitrary value of -1 is given when the gene is not expressed in a (sub)compartment.

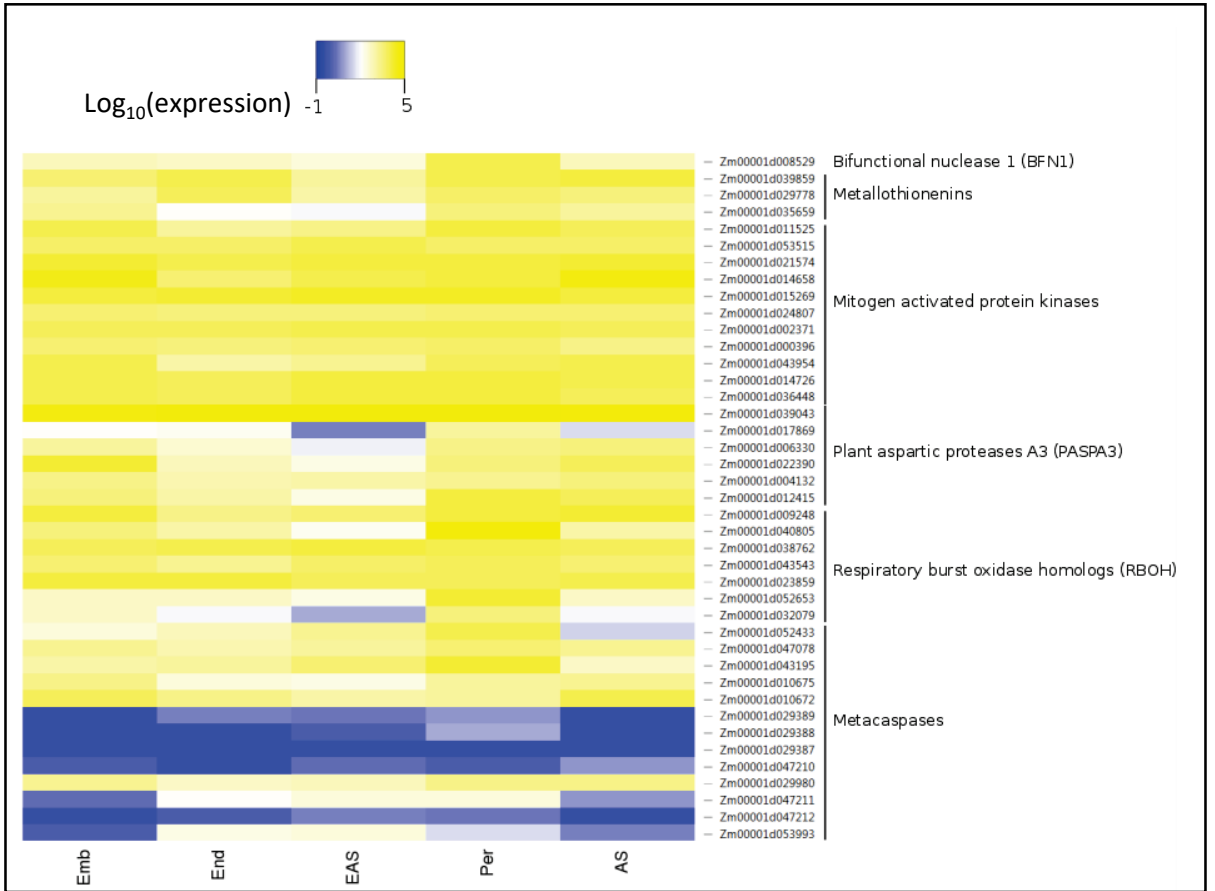

**Supplemental Figure 6.** Heat maps for genes potentially involved in programmed cell death. For the (sub)compartments, the logarithm (base 10) of the average of the normalized read counts between the 4 replicates has been taken. An arbitrary value of -1 is given when the gene is not expressed in a (sub)compartment.
